1                   **Phase separation of Myc differentially regulates gene transcription**

2  
3   Junjiao Yang<sup>1, 2, 3</sup>, Chan-I Chung<sup>1, 2, 3</sup>, Jessica Koach<sup>4</sup>, Hongjiang Liu<sup>5</sup>, Qian Zhao<sup>1, 2</sup>, Xiaoyu  
4   Yang<sup>5</sup>, Yin Shen<sup>5</sup>, William A. Weiss<sup>4</sup>, Xiaokun Shu<sup>1, 2, \*</sup>

5  
6   <sup>1</sup>Department of Pharmaceutical Chemistry, University of California, San Francisco, San  
7   Francisco, California, USA.

8   <sup>2</sup>Cardiovascular Research Institute, University of California, San Francisco, San Francisco,  
9   California, USA

10   <sup>3</sup>These authors contributed equally.

11   <sup>4</sup>Departments of Neurology, Neurological Surgery, Pediatrics, and Helen Diller Family  
12   Comprehensive Cancer Center, University of California, San Francisco, San Francisco, CA,  
13   USA.

14   <sup>5</sup>Institute for Human Genetics, Departments of Neurology, Weill Institute for Neurosciences,  
15   University of California, San Francisco, San Francisco, CA, USA.

16  
17   \*Correspondence to: Xiaokun Shu (email: [xiaokun.shu@ucsf.edu](mailto:xiaokun.shu@ucsf.edu))  
18  
19  
20

21 **Abstract**

22 Dysregulation and enhanced expression of *MYC* transcription factors including *MYC* and *MYCN*  
23 contribute to majority of human cancers. For example, *MYCN* is amplified up to several hundred-  
24 fold in high-risk neuroblastoma. One potential consequence of elevated expression is liquid-  
25 liquid phase separation (LLPS), occurring when the concentration of certain macromolecules and  
26 biopolymers is above a threshold. Here, we show that in *MYCN*-amplified human neuroblastoma  
27 cells, N-myc protein forms condensate-like structures. Using *MYCN*-nonamplified  
28 neuroblastoma cells that have no or little endogenous N-myc protein expression, we found that  
29 exogenously expressed N-myc undergoes LLPS in a concentration-dependent manner, and  
30 determined its threshold concentration for LLPS in the cellular context. Biophysically, N-myc  
31 condensates in live cells exhibit liquid-like behavior. The intrinsically disordered transactivation  
32 domain (TAD) of N-myc is indispensable for LLPS. Functionally, the N-myc condensates  
33 contain its obligatory DNA-binding and dimerization partner, genomic DNA, transcriptional  
34 machinery, and nascent RNA. These condensates are dynamically regulated during cell mitosis,  
35 correlated with chromosomal condensation and de-condensation. We further show that the TAD  
36 and the DNA-binding domain are both required for transcriptional activity of N-myc  
37 condensates. Most importantly, using a chemogenetic tool that decouples the role of phase  
38 separation from changes in protein abundance level in the nucleus, we discovered that N-myc  
39 phase separation regulates gene transcription and promotes SH-EP cell proliferation.  
40 Interestingly, LLPS of N-myc only modulates a small proportion of N-myc-regulated genes.  
41 Taken together, our results demonstrate that N-myc undergoes LLPS, and that its phase  
42 separation differentially modulates the transcriptome, partially contributes to gene transcription,  
43 and promotes cell proliferation. Our work opens a new direction in understanding Myc-related  
44 cancer biology that has been studied for several decades.

45  
46  
47  
48  
49

50 *MYC* family transcription factors are major contributors to human tumorigenesis. Expression of  
51 Myc is deregulated and enhanced in many types of cancers, due to copy number changes,  
52 chromosomal translocations, and upstream oncogenic signaling<sup>1-3</sup>. For instance, *MYCN* is highly  
53 amplified up to 100-to-300 fold in nearly half of high-risk neuroblastoma<sup>4-7</sup>. While upregulated  
54 Myc expression induces tumor development in many tissues, depletion of Myc abolishes  
55 tumorigenesis and results in tumor regression in various tumor models<sup>8-12</sup>. One potential  
56 consequence of elevated protein expression is phase separation, which is dependent on protein  
57 concentration<sup>13-17</sup>. Recently, many transcription factors that contain intrinsically disordered  
58 regions (IDR) have been reported to undergo LLPS, forming biomolecular condensates (also  
59 known as membraneless compartments, granules, or liquid droplets) when protein concentration  
60 surpass a threshold concentration<sup>18-21</sup>. Biomolecular condensates compartmentalize interacting  
61 proteins and signaling complexes<sup>14-16,21-24</sup>. Condensates of many transcriptional factors have  
62 been proposed and demonstrated to compartmentalize transcriptional machinery and to remodel  
63 gene transcription<sup>18-21,25</sup>.

64  
65 Myc oncoproteins are transcription factors with N-terminal TAD domains containing an IDR.  
66 Purified recombinant c-Myc-mEGFP has been shown to form condensates at high concentration  
67 (12  $\mu$ M), and partitions into MED1-IDR condensates<sup>19</sup>. On the other hand, it remains unknown  
68 whether Myc undergoes phase separation in living cells, whether the condensates have liquid  
69 properties and if they are transcriptionally active in living cells. Because neuroblastoma cells  
70 often contain highly amplified *MYCN*, we conducted immunostaining of N-myc in the *MYCN*-  
71 amplified Kelly neuroblastoma cells, observing punctate structures in the nuclei of these cancer  
72 cells. Next, we conducted live cell imaging using mEGFP tagged N-myc in the *MYCN*-  
73 nonamplified SH-EP neuroblastoma cells that have no or little endogenous N-myc protein  
74 expression. The imaging data showed that N-myc undergoes LLPS in a concentration-dependent  
75 manner. The N-myc condensates possess liquid-like behavior, compartmentalize transcriptional  
76 machinery and contain nascent RNAs.

77  
78 In addition to the important question of whether Myc condensates are transcriptionally active,  
79 another critical question to answer is whether phase separation plays a role in transcription,  
80 which has been challenging to investigate for the field of biomolecular condensate. This is  
81 because, on the one hand, protein phase separation is a concentration-dependent phenomena. A  
82 bio-condensate forms when protein abundance level exceeds a threshold. On the other hand, the  
83 protein abundance of transcription factors in the nucleus affects transcriptional activity. For  
84 example, protein level increase of YAP in the nucleus via cytoplasm-nuclear shuttling activates  
85 its transcription. It is thus critical to decouple role of phase separation from changes in protein  
86 abundance in the nucleus. Ideally, the role of phase separation should be determined by  
87 comparing activities of transcription factors in the homogeneously distributed state (i.e. dilute  
88 phase) versus condensed phase, with protein level of transcription factors in the nucleus  
89 maintained constant. Measurement of transcriptional activity when transcriptional factors  
90 undergo such spatial reorganization will define role of phase separation on transcription.

91  
92 Here we applied a chemogenetic tool to drive N-myc phase separation from the dilute phase to  
93 condensed phase without changing the N-myc protein level in the nucleus, which decouples the  
94 role of phase separation from changes in protein abundance. This enables us to determine role of  
95 N-myc phase separation on transcription. Our work reveals that while N-myc phase separation

96 indeed regulates transcription, only 6% of target genes are regulated by phase separation. These  
97 results suggest that phase separation differentially modulates the transcriptome, opening a new  
98 direction in understanding Myc-related cancer biology.

99

## 100 RESULTS

### 101 N-myc undergoes liquid-liquid phase separation in cells

102 We first imaged N-myc in *MYCN*-amplified human Kelly neuroblastoma cells.

103 Immunofluorescence imaging indicated that N-myc protein formed puncta in the nucleus (Fig.  
104 1a), which were not observed upon treatment with the MYC/MAX dimerization inhibitor<sup>26</sup>  
105 (Supporting Fig. S1). Importantly, in *MYCN*-nonamplified SH-EP and CLB-GA neuroblastoma  
106 cells, we did not observe obvious punctate structures based on immunofluorescence (Supporting  
107 Fig. S2), suggesting that formation of N-myc puncta is dependent on its expression levels  
108 because CLB-GA and SH-EP has no or little expression of endogenous N-myc (Supporting Fig.  
109 S3). To further characterize N-myc, we conducted live-cell imaging of the SH-EP cells. We  
110 fused mEGFP to N-myc (N-myc-mEGFP), which was exogenously expressed in SH-EP cells.  
111 Fluorescence imaging of single cells showed that N-myc-mEGFP formed puncta in a  
112 concentration-dependent manner. In particular, N-myc-mEGFP was evenly distributed and did  
113 not form punctate structures until its expression level was above a threshold concentration (i.e.  
114 saturation concentration) (Fig. 1b).

115

116 To quantitatively analyze the data, we determined the percentage of N-myc in punctate structures  
117 over total in single cells by defining SPARK signal, which is the ratio of summarized  
118 fluorescence intensity of N-myc in the puncta (i.e. amount of N-myc in the punctate structure)  
119 divided by summarized fluorescence intensity of total N-myc in each cell. Our data showed that  
120 N-myc formed punctate structures with threshold or saturation concentration  $\sim 300 - 400$  nM  
121 (here the protein concentration was estimated based on purified mEGFP, see Methods and  
122 Supporting Fig. S4). Briefly, below the saturation concentration, e.g. at  $\sim 250$  nM, N-myc was  
123 evenly distributed in the nucleus (Fig. 1b, upper-right). Above the saturation concentration, e.g.  
124 at  $\sim 500$  nM, N-myc formed puncta in the nucleus (Fig. 1b, lower-right). Thus, our data shows  
125 that N-myc-mEGFP undergoes concentration-dependent spatial reorganization. We estimated  
126 that the N-myc concentration is around  $0.7 - 1 \mu\text{M}$  in the Kelly cells (Supporting Fig. S5). We  
127 also characterized relationship of number and size of the N-myc puncta to the protein levels. The  
128 number of N-myc puncta increases as N-myc protein level increases (Supporting Fig. S6A). The  
129 size of N-myc puncta is in the range of  $0.4 - 1 \mu\text{m}$  (diameter), and this distribution is  
130 independent of the protein levels (Supporting Fig. S6B). This suggests that N-myc tends to form  
131 new puncta when the protein level increases.

132

133 Next, we determined whether the N-myc puncta exhibit liquid-like properties. We conducted  
134 time-lapse imaging and characterized fusion events between the punctate structures. These  
135 puncta can fuse and coalesce within a few seconds. The fusing puncta initially formed a  
136 dumbbell shape, which over time relaxed to a spherical shape (Fig. 1c). Quantitative analysis  
137 showed that aspect ratio of the fusing puncta over time fits well to a single exponential curve  
138 (Fig. 1c, lower left), which is a well-known characteristic of coalescing liquid droplets<sup>27,28</sup>.  
139 Furthermore, we used this data to determine inverse capillary velocity ( $= \eta/\gamma$ ; here  $\gamma$  is surface  
140 tension of the droplet;  $\eta$  is viscosity), which was  $1.2 \pm 0.2$  (s/ $\mu\text{m}$ ) (Fig. 1c, lower right). Thus,  
141 quantitative analysis of the fusion events indicated that the punctate structures of N-myc contain

142 liquid properties and thus they are liquid droplets. This suggests that N-myc-mEGFP undergoes  
143 LLPS, forming liquid-like condensates when its concentration exceeds above the threshold.

144

145 The Myc TAD domain, which spans the N-terminal conserved motifs, including three “Myc  
146 boxes” (MB0-II) from 1 to 137 residues (for N-myc, which totals 464 residues), is intrinsically  
147 disordered<sup>29,30</sup>. To examine role of the TAD in N-myc LLPS, we designed and characterized a  
148 TAD truncation mutant (N-myc<sup>138-464</sup>). Live cell imaging revealed that this mEGFP-tagged  
149 fusion protein (N-myc<sup>138-464</sup>-mEGFP) no longer formed condensates even above 2  $\mu$ M  
150 concentration (Fig. 1d),  $\sim$  5-fold above the threshold concentration of LLPS for full length N-  
151 myc. Therefore, our data demonstrate that N-myc LLPS depends on the IDR-containing TAD,  
152 consistent with LLPS of many other proteins that also rely on their IDR.

153

### 154 **N-myc condensates contain DNA-binding partner MAX and genomic DNA**

155 To examine whether the N-myc condensates are transcriptionally active, we first determined that  
156 N-myc condensates contain the obligatory DNA-binding partner MAX. To visualize MAX in  
157 living cells, we labeled it with a red fluorescent protein mKO3. Multicolor fluorescence imaging  
158 showed that MAX also formed condensates in cells that contained N-myc condensates, and that  
159 the green N-myc condensates colocalized with the red MAX condensates (Fig. 2A). In cells  
160 without N-myc-mEGFP, MAX did not form condensates (Supporting Fig. S7). These data  
161 suggest that N-myc condensates recruit its DNA-binding partner MAX.

162

163 Next, we determined that the N-myc condensates contained genomic DNA of the N-myc target  
164 gene *p53*<sup>31,32</sup>. We labeled the *p53* DNA using fluorescence in situ hybridization (FISH).  
165 Confocal fluorescence imaging revealed that N-myc condensates were associated with the  
166 genomic DNA of *p53* (Fig. 2B). These data suggest that the N-myc condensates bind genomic  
167 DNA, consistent with the above results that these condensates contain the DNA-binding partner  
168 MAX. Thus, the N-myc condensates have a potential to activate gene transcription.

169

### 170 **N-myc condensates contain transcriptional machinery and nascent RNA**

171 Next, we determined that N-myc condensates contain transcriptional machinery, including the  
172 Mediator and RNA polymerase II (Pol II). First, immunofluorescence imaging showed that the  
173 Mediator of RNA polymerase II transcription subunit 1 (MED1) formed condensates, consistent  
174 with previous studies. Furthermore, N-myc condensates colocalized with MED1 condensates  
175 (Fig. 2C), indicating that N-myc condensates contain MED1. Second, we stained the cells with  
176 antibodies against phosphorylated Pol II at Ser5 (Pol II S5p) at the C-terminal domain.  
177 Immunofluorescence imaging showed punctate structures of Pol II S5p, which colocalized with  
178 N-myc condensates based on two-color imaging (Fig. 2D). Therefore, our data indicate that N-  
179 myc condensates contain Pol II. We also imaged Kelly cells and showed that N-myc puncta  
180 colocalized with MED1 and Pol II (Supporting Fig. S8).

181

182 We next determined that the N-myc condensates contained nascent RNA. We incubated cells  
183 with uridine analog 5-ethynyluridine (EU) for 1 hour so that EU was incorporated into newly  
184 transcribed RNA. The EU-labeled nascent RNA was detected through a copper (I)-catalyzed  
185 cycloaddition reaction (i.e. “click” chemistry) using azides labeled with red fluorescent dyes<sup>33</sup>.  
186 Fluorescence imaging revealed several punctate structures (Fig. 2E). The round structures of

187 nascent RNAs colocalized with the N-myc condensates, suggesting that these N-myc  
188 condensates contain nascent RNAs.

189  
190 Lastly, we quantified the colocalization of N-myc condensates with MAX, MED1, Pol II S5p  
191 and nascent RNAs (Fig. 2F, Methods). We calculate that ~92% of N-myc condensates contained  
192 MAX. The percentage of N-myc condensates that contain MED1, Pol II S5p and nascent RNAs  
193 is ~ 72%, 62%, 80%, respectively.

194  
195 **N-myc condensates are dynamically regulated during cell mitosis.**

196 Because many biomolecular condensates disassemble during mitosis<sup>34</sup>, we examined whether N-  
197 myc condensates were also regulated dynamically during cell cycle. Live-cell fluorescence  
198 imaging showed that N-myc condensates dissolved when cells entered mitosis (Fig. 3A, left  
199 panel). Upon mitotic entry, chromatin condenses even though nuclear chromatin is already  
200 compacted in the interphase. It has been well established that many transcription factors  
201 disengage from chromatin when cells enter mitosis. We thus decided to investigate the  
202 relationship between N-myc condensate dissolution and chromatin condensation upon entry into  
203 mitosis. To visualize chromatin, we labeled histone 2B (H2B) with a near-infrared fluorescent  
204 protein mIFP. This allowed us to quantify volume of chromatin using fluorescent protein labeled  
205 H2B<sup>35</sup>. Time-lapse imaging revealed that dissolution of N-myc condensates preceded chromatin  
206 condensation by ~ 6 minutes (Fig. 3A, right panel). The dissolution of N-myc condensates also  
207 occurred before nuclear breakdown (Fig. 3A, T ~ 16 min.).

208  
209 Next, we examined whether N-myc reformed condensates when cells exit mitosis. Time-lapse  
210 imaging revealed that indeed upon mitotic exit, N-myc condensates reappeared. We also  
211 observed that chromatin decondensed during mitotic exit, consistent with previous studies<sup>35</sup>.  
212 Interestingly, during mitotic exit, N-myc condensate formed after chromatin decondensation with  
213 a delay of ~ 6-minutes (Fig. 3B). This contrasts mitotic entry, where dissolution of N-myc  
214 condensates occurred before chromatin condensation. These results are biologically consistent  
215 however, as when the chromatin condenses during mitosis, N-myc condensates dissolve; but  
216 when chromatin decondenses during interphase, N-myc condensates reassemble.

217  
218 Our study thus reveals that N-myc condensates are dynamically regulated during mitosis, and that  
219 the condensate disassembly and reassembly is correlated with chromatin condensation and de-  
220 condensation, respectively. Because many transcription factors disengage from chromatin when  
221 cells enter mitosis and re-associate with chromatin when cells exit mitosis, we investigated a  
222 potential role of the N-myc DNA binding domain bHLH-LZ (366-464 aa) on N-myc phase  
223 separation. We truncated bHLH-LZ and measured phase separation of this truncation mutant N-  
224 myc<sup>1-365</sup>. Indeed, the saturation concentration of this mutant is ~ 620 – 720 nM (Fig. 3C, blue  
225 box), which is ~ 2-fold more than the saturation concentration of N-myc (~ 300 – 400 nM, Fig.  
226 1B; red box in Fig. 3C). Our data thus suggest that the DNA binding domain plays a critical role  
227 and contributes to N-myc phase separation, which likely explains the dynamic regulation of N-  
228 myc condensates during mitosis.

229  
230 **Transcriptional activity of N-myc condensates requires both TAD and bHLH-LZ domains**

231 Because our data indicate that both the TAD and bHLH-LZ domains are important for N-myc  
232 LLPS, we examined whether both domains were required for transcriptional activity of N-myc



233 condensates. Here we applied a chemogenetic tool named SparkDrop to drive phase separation  
234 of both N-myc mutants (Fig. 4A). SparkDrop drives protein phase separation by a small  
235 molecule-induced multivalent interaction. Briefly, SparkDrop is based on a newly engineered  
236 protein pair CEL (109 amino acids [aa]) and ZIF (31aa), which, upon addition of lenalidomide  
237 (lena), form a heterodimer (CEL···lena···ZIF). To induce LLPS, we fused the N-myc mutants to  
238 mEGFP and CEL (N-myc-mEGFP-CEL). To incorporate multivalency, we utilized a de novo  
239 designed coiled coil that is a homo-tetramer (HOTag6). We fused ZIF, a nuclear localization  
240 signal (NLS), and a non-green fluorescent EGFP mutant (EGFP-Y66F) to HOTag6 (ZIF-NLS-  
241 EGFP(Y66F)-HOTag6).

242  
243 First, we demonstrated that SparkDrop induced phase separation of TAD-deleted N-myc<sup>138-464</sup>  
244 upon addition of lenalidomide (Fig. 4A). The condensates recruited the DNA-binding partner  
245 MAX as expected (Fig. 4B). In contrast, most of the N-myc condensates did not contain MED1  
246 (Fig. 4C) or Pol II S5p (Supporting Fig. S9A). Most (98%) of the N-myc condensates contained  
247 MAX, whereas Med1 and Pol II S5 P showed ~5% and 0.4% colocalization, respectively (Fig.  
248 4D). These data thus suggest that the TAD domain is critical for transcriptional activity of N-  
249 myc condensates.

250  
251 Next, we showed that SparkDrop was also able to drive phase separation of bHLH-LZ-deleted  
252 N-myc<sup>1-365</sup> (Fig. 4E). The majority of these condensates contained no MED1 or Pol II S5p, ~13%  
253 and ~4% colocalization, respectively (Fig. 4F, Supporting Fig. S9B), indicating that they are  
254 largely inactive in gene transcription. As expected, these condensates contained no MAX (Fig.  
255 4F). Therefore, our data suggest that the DNA-binding domain is also critical for transcriptional  
256 activity of N-myc condensates. Together, our results indicate that the transcriptional activity of  
257 N-myc condensates requires both the TAD and the DNA-binding domains, and that without the  
258 TAD or the DNA-binding domain of N-myc, condensate formation itself does not recruit the  
259 transcriptional machinery.

260  
261 **The chemogenetic tool SparkDrop decouples N-myc LLPS from protein abundance**  
262 While we have demonstrated that N-myc undergoes LLPS and forms liquid condensates, and that  
263 these condensates are transcriptionally active, another key question is whether phase separation,  
264 i.e. condensate formation itself, promotes or regulates gene transcription. Protein condensate  
265 formation can be divided into two steps: 1) protein level increase above saturation concentration;  
266 2) phase separation, which is essentially a spatial reorganization from a homogenous distribution  
267 (dilute phase) to a condensed state or phase. The abundance of a transcription factor (e.g. YAP)  
268 is known to regulate transcription. Therefore, to understand role of phase separation, it is  
269 essential to decouple phase separation from protein abundance.

270  
271 Here, we turned to the chemogenetic tool SparkDrop that enables us to drive LLPS without  
272 changing protein levels, thus decoupling phase separation from protein abundance. We tagged N-  
273 myc by SparkDrop (N-myc/SparkDrop) and demonstrated that SparkDrop induced phase  
274 separation of N-myc without change of protein levels, and that the induced N-myc/SparkDrop  
275 condensates are liquid droplets. In particular, we first showed that lenalidomide-activatable  
276 SparkDrop induced N-myc condensate formation within 6 – 10 minutes (Fig. 5A). The total  
277 fluorescence of N-myc showed little change during phase separation, suggesting that N-myc  
278 protein level was constant in the nucleus. Two negative controls showed that DMSO did not

279 induce N-myc phase separation, and that lenalidomide alone could not drive N-myc phase  
280 separation using the N-myc/SparkDrop control (no HOTag6). Furthermore, without N-myc,  
281 SparkDrop did not form droplets upon addition of lenalidomide (Fig. S11). We also  
282 demonstrated that in the absence of lenalidomide, N-myc/SparkDrop undergoes LLPS with  
283 saturation concentration  $\sim 330 - 400$  nM (Supporting Fig. S10), similar to that of N-myc-  
284 mEGFP, indicating that the SparkDrop tag itself had little effect on N-myc's phase separation  
285 properties. Lastly, we showed that the N-myc/SparkDrop condensates were able to fuse and  
286 coalesce together, indicating that they are liquid droplets (Supporting Fig. S12).

287  
288 Next, we determined that N-myc/SparkDrop condensates are transcriptionally active. First, the  
289 N-myc/SparkDrop condensates contained the DNA-binding and dimerization partner MAX, with  
290 colocalization  $\sim 95\%$  (Fig. 5B). Second, the N-myc/SparkDrop condensates contained  
291 transcriptional machinery including MED1 and Pol II S5p (Fig. 5C, D). Lastly, the N-  
292 myc/SparkDrop condensates contained nascent RNA (Fig. 5F). Colocalization of MAX, MED1,  
293 Pol II S5, and nascent RNA to N-myc condensates was 95%, 85%, 72%, and 80%, respectively  
294 (Fig. 5F). These data thus suggest that SparkDrop decouples phase separation from protein  
295 levels, and that the SparkDrop-induced N-myc condensates are transcriptionally active in cells,  
296 paving the way for investigating functional roles of phase separation.

### 297 298 **LLPS of N-myc regulates cell proliferation and gene transcription**

299 We first determined that phase separation of N-myc promotes cell proliferation. Here we  
300 engineered SH-EP cells that stably express N-myc/SparkDrop. We measured cell proliferation  
301 rate and found that it increased by  $15 \pm 4\%$  when N-myc formed condensates using  
302 lenalidomide-activatable SparkDrop in comparison to the DMSO-treated cells that contained N-  
303 myc in the dilute phase (Fig. 5G, H). Furthermore, we also conducted control experiments with  
304 the N-myc/SparkDrop control (no HOTag6), which showed that lenalidomide alone had little  
305 effect on cell proliferation.

306  
307 Next, we examined whether phase separation of N-myc regulated gene transcription. Here, we  
308 treated the stable cells with or without lenalidomide, which showed condensed or dilute phase of  
309 N-myc, respectively (Fig. 5H). Western blot analysis confirmed that the protein levels of N-myc  
310 showed little difference between the dilute and the condensed phase (Fig. 5I). Furthermore,  
311 mRNA level of *MYCN* also showed little change upon N-myc phase separation, based on the  
312 RNA-sequencing (RNA-seq) analysis (see next section). We chose two N-myc-regulated genes  
313 serine incorporator 2 (*SERINC2*) and annexin A8 (*ANXA8*) to examine if their transcription is  
314 regulated upon N-myc phase separation. RT-qPCR analysis revealed that the mRNA levels of  
315 *SERINC2* and *ANXA8* were significantly higher for the condensed N-myc than the dilute N-  
316 myc (Fig. 5J). These results suggest that N-myc phase separation increases transcription of these  
317 genes. As a control, we showed that lenalidomide alone did not affect transcription of these two  
318 genes (Fig. 5J), based on the N-myc/SparkDrop control (no HOTag6), which did not form  
319 condensates upon addition of lenalidomide (Fig. 5H). Therefore, our data indicate that N-myc  
320 phase separation regulates transcriptional activity and promotes proliferation of SH-EP cells.

### 321 322 **N-myc phase separation differentially modulates the transcriptome**

323 To further understand how phase separation of N-myc affects global gene transcription, we  
324 conducted RNA-seq analysis. By comparing the RNA-seq data of N-myc in condensed phase



325 versus those of N-myc in dilute phase, we calculated statistically significant DE (differentially  
326 expressed) genes (DEGs; p-value < 0.01, FDR < 0.1), which revealed global changes of gene  
327 expression upon N-myc phase separation (while N-myc expression was at the same level) (Fig.  
328 6A, B). These genes have modest change in magnitude, consistent with typical changes of Myc-  
329 regulated genes<sup>36</sup>. As a control, we confirmed that lenalidomide itself had little effect on N-myc  
330 transcription because only 4 DEGs overlapped with DEGs by N-myc LLPS (Fig. 6C, Supporting  
331 Fig. S14). LLPS-regulated DEGs include 660 genes (Supporting Fig. S13, supporting excel file  
332 1). Gene ontology (GO) enrichment analysis reveals that the LLPS-regulated genes are strongly  
333 linked to several Myc-related biological processes including cell adhesion, ribosomal biogenesis,  
334 and cell differentiation (Fig. 6D).

335  
336 While N-myc phase separation regulated 660 genes, our data showed that phase separation had  
337 no large impact on the global transcriptomic signature of N-myc. We compared the DEGs of N-  
338 myc in the condensed phase versus those of N-myc in the dilute phase (Fig. 6E, supporting excel  
339 files 2 and 3), which showed that the transcriptomic signature is largely unchanged. Furthermore,  
340 we compared phase separation-regulated genes with N-myc (dilute phase)-regulated genes (Fig.  
341 6F), which revealed that phase separation modulates fewer than 6% of N-myc-regulated genes.  
342 Therefore, our data indicate that phase separation selectively or differentially regulates N-myc  
343 transcription, while maintaining the global transcriptomic signature of N-myc. As a control, we  
344 verified that lenalidomide itself had little effect on N-myc transcription because only 10 out of  
345 9411 genes regulated by N-myc overlap with those regulated by lenalidomide itself (Supporting  
346 Fig. S15). In total, there are 11 DEGs regulated by lenalidomide alone by calculating DEGs from  
347 N-myc/SparkDrop control (no HOTA6) with lenalidomide versus DMSO (Supporting excel file  
348 4).

349  
350 Because Myc (including N-myc) and MAX heterodimer binds E-box and many Myc regulated  
351 genes are reported to contain E-box motif<sup>37</sup>, we conducted E-box enrichment analysis between  
352 the LLPS-regulated and LLPS-independent genes. First, when we include all of the LLPS-  
353 regulated genes regardless of fold change, E-box is slightly enriched but it is not statistically  
354 significant with p-value = 0.06 (Fig. 6G). Next, we divided the LLPS-regulated genes into two  
355 groups according to fold change: a strongly regulated group and a weakly regulated group. The  
356 strongly regulated group contain LLPS-regulated genes with  $|\text{Log}_2\text{FC}| > 0.3$ , while the weakly  
357 regulated group contain LLPS-regulated genes with  $|\text{Log}_2\text{FC}| < 0.3$ . The strongly regulated group  
358 shows significant E-box enrichment (p-value < 0.001). In contrast, the weakly-regulated group  
359 does not show E-box enrichment (p-value = 0.69). Furthermore, when we compared the strongly  
360 regulated group against the weakly regulated group, E-box is also significantly enriched (p-value  
361 < 0.01). These data suggest that regulation of gene transcription by N-myc LLPS is correlated  
362 with E-box enrichment. The genes with relatively strong regulation by LLPS are enriched with  
363 the E-box motif over the LLPS-independent or weakly regulated genes.

364  
365 Lastly, we examined a previous list of 41 core genes of Myc<sup>38</sup>, and found that 38 out of 41 were  
366 regulated in the SH-EP cells with dilute phase N-myc/SparkDrop (Supporting Fig. S16). This  
367 suggests that the SparkDrop system had little perturbation on the core transcriptional function of  
368 N-myc. Therefore, our SparkDrop-based approach is appropriate for identifying the genes that  
369 are regulated by N-myc LLPS. SparkDrop is thus a versatile chemogenetic tool for studying the  
370 role of phase separation for many other transcriptional factors.

371  
372  
373  
374  
375  
376  
377  
378  
379  
380  
381  
382  
383  
384  
385  
386  
387  
388  
389  
390  
391  
392  
393  
394  
395  
396  
397  
398  
399  
400  
401  
402  
403  
404  
405  
406  
407  
408  
409  
410  
411  
412  
413  
414  
415

## Discussion

**MYC undergoes LLPS forming liquid droplets.** Recently, several studies have revealed important roles of oncoprotein condensates in oncogenic signaling and transcription<sup>39-46</sup>. In this work, we examined the MYC transcription factor N-myc and found that N-myc formed punctate structures in *MYCN*-amplified human neuroblastoma cells, suggesting that N-myc may form condensates when it is highly expressed. To further examine N-myc condensates in living cells, we tagged N-myc by mEGFP and exogenously expressed the fusion protein N-myc-mEGFP in the *MYCN*-nonamplified neuroblastoma SH-EP cells that have no or little endogenous N-myc expression. Our single cell analysis showed that N-myc undergoes concentration-dependent LLPS, and we determined the threshold concentration for LLPS at ~ 300 – 400 nM. Using time-lapse imaging, we further established that N-myc condensates contain liquid-like properties. The inverse capillary velocity of these fusing droplets was ~ 55% of that of P granules<sup>47</sup>, and ~30 to 80 times lower than that of nucleoli<sup>27,28</sup>.

**N-myc condensates are transcriptionally active.** One of the key questions in the condensate biology field is whether the biomolecular condensates are biologically active. Here we determined that the N-myc condensates are transcriptionally active, because they compartmentalize the DNA-binding and dimerization partner MAX, genomic DNA of its target gene p53, transcriptional machinery including the Mediator complex and RNA Pol II. These condensates also contain nascent RNAs. Most importantly, using the chemogenetic tool SparkDrop, we determined that N-myc condensates regulate transcription.

Here, SparkDrop drives protein phase separation without changing the abundance of N-myc protein in the nucleus. Thus, SparkDrop decouples the role of phase separation on transcription, from increased protein levels that are well known to affect transcription. Our data not only reveal that N-myc condensates are transcriptionally active, but also that phase separation of N-myc contributes to transcription. Phase separation is essentially a spatial reorganization from homogeneously distributed dilute phase to condensed phase. Our results suggest that such spatial reorganization of N-myc in the nucleus can affect gene transcription. Thus, our work shows that it is biologically important to examine role of phase separation for transcription factors.

**N-myc phase separation and transcriptional activity requires TAD and chromatin binding.** Many studies report that protein phase separation often requires the intrinsically disordered region. Here we also showed that N-myc LLPS requires the intrinsically disordered TAD. Furthermore, we also discovered that the DNA-binding domain of N-myc also contributes to phase separation, because lack of the bHLH-LZ domain increased the threshold concentration for LLPS. Consistently, we found that N-myc LLPS was dynamically regulated during cell mitosis when most transcription factors disengage from chromatin. The N-myc condensates disassembled when cells entered mitosis and reassembled upon mitotic exit. Furthermore, this dynamic regulation is correlated with chromosomal changes during mitosis. The N-myc condensates dissolve ~ 6 minutes before chromosome condensation upon mitotic entry. Upon mitotic exit, the N-myc condensates reformed ~ 6 minutes after chromosome de-condensation.

416 Other biomolecular condensates known to dissolve during mitosis include cytosolic condensates  
417 such as stress granules and P-bodies, as well as nuclear condensates such as nucleoli and nuclear  
418 speckles<sup>34</sup>. While recent work has unveiled regulatory mechanisms of condensates such as stress  
419 granules, for many other condensates, it remains unclear how their LLPS is regulated during  
420 mitosis<sup>34</sup>. Here, we discovered that disassembly and reassembly of the N-myc condensates  
421 correlated with chromosome condensation and de-condensation, respectively. While  
422 chromosomes are already compacted in interphase, they are further condensed during mitosis. It  
423 is well established that transcription mostly stops during mitosis. Most transcription factors  
424 dissociate from the condensed chromosomes when cells enter mitosis, and reassociate with  
425 decondensed chromosomes upon mitotic exit<sup>48-50</sup>.

426  
427 **Phase separation of N-myc differentially regulates transcriptome.** Biomolecular condensates  
428 form via phase separation when protein levels exceed a threshold concentration. Arguably, the  
429 most important and challenging question that remains mostly unanswered in the condensate  
430 biology field is whether phase separation confers new or additional biological functions or  
431 activities, such as affecting gene transcription by transcription factors. Furthermore, does phase  
432 separation of a transcription factor equally or differentially regulate its downstream genes?  
433 Protein condensate formation is composed of two steps: 1) protein level increase; 2) phase  
434 separation, which is essentially a spatial reorganization from a homogenous distribution (dilute  
435 phase) to a condensate state (condensed phase). Protein level increase of a transcription factor  
436 (e.g. YAP) is known to regulate transcription. Therefore, to understand role of phase separation,  
437 it is essential to decouple phase separation from increased protein levels.

438  
439 Here, we utilized the chemogenetic tool SparkDrop that drives protein phase separation without  
440 changing protein levels, to manipulate N-myc phase separation in living cells. SparkDrop  
441 enables decoupling of N-myc phase separation from its abundance in the nucleus. Using the  
442 neuroblastoma SH-EP cell as a model, we show that phase separation of N-myc does contribute  
443 to transcription, and even more interestingly, it modulates a small percentage of genes (< 6%)  
444 out of the several thousand regulated by N-myc. The LLPS-regulated genes with relatively large  
445 fold change are significantly enriched with the E-box motif over the LLPS-independent or  
446 weakly regulated genes. This suggests that N-myc LLPS may exert transcriptional regulation by  
447 interacting with E-box motifs. Taken together, our work indicates that N-myc phase separation  
448 does regulate gene transcription (likely through the E-box), and more interestingly, it  
449 differentially regulates transcriptome with little change of the global transcriptomic signature.

450  
451 In summary, our work establishes that N-myc undergoes LLPS in live cells, forming liquid-like  
452 condensates that are transcriptionally active. Phase separation of N-myc differentially modulates  
453 transcriptome, and partially contributes to transcription of many genes. Consistently, N-myc  
454 LLPS promotes cell proliferation. While these encouraging results may only be able to answer a  
455 small portion of Myc-related questions, our work opens new directions to spur future studies in  
456 understanding important Myc-related cancer biology that has been studied for several decades.

457  
458  
459  
460  
461

462 **Acknowledgments:** We thank Hiten Madhani, Vijay Ramani, and Eric Holland for critical  
463 suggestions.

464 **Funding:** This work was supported by NIH R01CA258237 and U01DK127421 (to X.S.), and  
465 NIH P01CA217959, P30CA082103, U01CA217864, and grants from the Alex Lemonade Stand,  
466 St. Baldrick, and Samuel Waxman Cancer Research Foundations (to W.A.W.), and  
467 U01DA052713 (to Y.S.).

468 **Author contributions:** X.S. conceived the project. X.S., J.Y., C-I.C designed the experiments  
469 and composed the manuscript. J.Y. performed N-myc phase separation and colocalization with  
470 other proteins in cells. C-I.C. conducted imaging of small molecule induced N-myc phase  
471 separation and analyzed colocalization with other proteins. C-I.C. performed and analyzed  
472 nascent RNA labeling, RT-qPCR and RNA-seq. J.K. and W.A.W planned and performed  
473 experiments to analyze expression of endogenous N-myc protein in the neuroblastoma cells.  
474 H.L. processed RNA-seq data. H.L., C-I.C, J.Y., Q.Z., X.Y., X.S., Y.S. analyzed RNA-seq data.  
475 All authors contributed to the final draft.

476 **Competing interests:** X.S. and W.A.W. are co-founders of Granule Therapeutics.

477 **Data and materials availability:** All data are available in the main text or the supplementary  
478 materials.

479 **Code Availability:** All relevant codes are available upon request.

480  
481

## 482 **Supplementary Materials:**

483 Materials and Methods

484 Figures S1-S16

485 Supporting excel files 1 – 4 (list of DEGs from RNA-seq)

486  
487  
488  
489  
490

## 491 References

- 492 1. Baluapuri, A., Wolf, E. & Eilers, M. Target gene-independent functions of MYC  
493 oncoproteins. *Nat Rev Mol Cell Biol* 1–13 (2020). doi:10.1038/s41580-020-0215-2
- 494 2. Dang, C. V. MYC on the Path to Cancer. *Cell* **149**, 22–35 (2012).
- 495 3. Meyer, N. & Penn, L. Z. Reflecting on 25 years with MYC. *Nat Rev Cancer* **8**, 976–990  
496 (2008).
- 497 4. Cheng, J. M. *et al.* Preferential amplification of the paternal allele of the N-myc gene in  
498 human neuroblastomas. *Nat Genet* **4**, 191–194 (1993).
- 499 5. Brodeur, G. M., Seeger, R. C., Schwab, M., Varmus, H. E. & Bishop, J. M. Amplification  
500 of N-myc in Untreated Human Neuroblastomas Correlates with Advanced Disease Stage.  
501 *Science* **224**, 1121–1124 (1984).
- 502 6. Kohl, N. E., Gee, C. E. & Alt, F. W. Activated expression of the N-myc gene in human  
503 neuroblastomas and related tumors. *Science* **226**, 1335–1337 (1984).
- 504 7. Pugh, T. J. *et al.* The genetic landscape of high-risk neuroblastoma. *Nat Genet* 1–9 (2013).  
505 doi:10.1038/ng.2529
- 506 8. Chantry, Y. H. *et al.* Paracrine signaling through MYCN enhances tumor-vascular  
507 interactions in neuroblastoma. *Science Translational Medicine* **4**, 115ra3–115ra3 (2012).
- 508 9. Murphy, D. J. *et al.* Distinct Thresholds Govern Myc's Biological Output In Vivo. *Cancer*  
509 *Cell* **14**, 447–457 (2008).
- 510 10. Soucek, L. *et al.* Modelling Myc inhibition as a cancer therapy. *Nature* **455**, 679–683  
511 (2008).
- 512 11. Smith, D. P., Bath, M. L., Metcalf, D., Harris, A. W. & Cory, S. MYC levels govern  
513 hematopoietic tumor type and latency in transgenic mice. *Blood* **108**, 653–661 (2006).
- 514 12. Felsher, D. W. & Bishop, J. M. Reversible tumorigenesis by MYC in hematopoietic  
515 lineages. *Mol Cell* **4**, 199–207 (1999).
- 516 13. Choi, J.-M., Holehouse, A. S. & Pappu, R. V. Physical Principles Underlying the  
517 Complex Biology of Intracellular Phase Transitions. *Annual review of biophysics* **49**,  
518 annurev-biophys-121219-081629-27 (2020).
- 519 14. Wheeler, R. J. & Hyman, A. A. Controlling compartmentalization by non-membrane-  
520 bound organelles. *Philosophical Transactions of the Royal Society B: Biological Sciences*  
521 **373**, 20170193–9 (2018).
- 522 15. Banani, S. F., Lee, H. O., Hyman, A. A. & Rosen, M. K. Biomolecular condensates:  
523 organizers of cellular biochemistry. *Nat Rev Mol Cell Biol* 1–14 (2017).  
524 doi:10.1038/nrm.2017.7
- 525 16. Hyman, A. A., Weber, C. A. & Jülicher, F. Liquid-Liquid Phase Separation in Biology.  
526 *Annu Rev Cell Dev Biol* **30**, 39–58 (2014).
- 527 17. Hyman, A. A. & Simons, K. Cell biology. Beyond oil and water--phase transitions in  
528 cells. *Science* **337**, 1047–1049 (2012).
- 529 18. Zamudio, A. V. *et al.* Mediator Condensates Localize Signaling Factors to Key Cell  
530 Identity Genes. *Mol Cell* 1–2 (2019). doi:10.1016/j.molcel.2019.08.016
- 531 19. Boija, A. *et al.* Transcription Factors Activate Genes through the Phase-Separation  
532 Capacity of Their Activation Domains. *Cell* **175**, 1842–1855.e16 (2018).
- 533 20. Chong, S. *et al.* Imaging dynamic and selective low-complexity domain interactions that  
534 control gene transcription. *Science* **361**, eaar2555–11 (2018).



- 535 21. Hnisz, D., Shrinivas, K., Young, R. A., Chakraborty, A. K. & Sharp, P. A. Perspective.  
536 *Cell* **169**, 13–23 (2017).
- 537 22. Lyon, A. S., Peeples, W. B. & Rosen, M. K. A framework for understanding the functions  
538 of biomolecular condensates across scales. *Nat Rev Mol Cell Biol* 1–21 (2021).  
539 doi:10.1038/s41580-020-00303-z
- 540 23. Alberti, S. & Hyman, A. A. Biomolecular condensates at the nexus of cellular stress,  
541 protein aggregation disease and ageing. *Nat Rev Mol Cell Biol* 1–18 (2021).  
542 doi:10.1038/s41580-020-00326-6
- 543 24. Shin, Y. & Brangwynne, C. P. Liquid phase condensation in cell physiology and disease.  
544 *Science* **357**, eaaf4382 (2017).
- 545 25. Li, C. H. *et al.* MeCP2 links heterochromatin condensates and neurodevelopmental  
546 disease. *Nature* 1–28 (2020). doi:10.1038/s41586-020-2574-4
- 547 26. Han, H. *et al.* Small-Molecule MYC Inhibitors Suppress Tumor Growth and Enhance  
548 Immunotherapy. *Cancer Cell* 1–31 (2019). doi:10.1016/j.ccell.2019.10.001
- 549 27. Feric, M. *et al.* Coexisting Liquid Phases Underlie Nucleolar Subcompartments. *Cell* **165**,  
550 1686–1697 (2016).
- 551 28. Brangwynne, C. P., Mitchison, T. J. & Hyman, A. A. Active liquid-like behavior of  
552 nucleoli determines their size and shape in *Xenopus laevis* oocytes. *Proceedings of the*  
553 *National Academy of Sciences* **108**, 4334–4339 (2011).
- 554 29. Andresen, C. *et al.* Transient structure and dynamics in the disordered c-Myc  
555 transactivation domain affect Bin1 binding. *Nucleic Acids Res* **40**, 6353–6366 (2012).
- 556 30. McEwan, I. J., Dahlman-Wright, K., Ford, J. & Wright, A. P. Functional interaction of the  
557 c-Myc transactivation domain with the TATA binding protein: evidence for an induced fit  
558 model of transactivation domain folding. *Biochemistry* **35**, 9584–9593 (1996).
- 559 31. Chen, L. *et al.* p53 is a direct transcriptional target of MYCN in neuroblastoma. *Cancer*  
560 *Res* **70**, 1377–1388 (2010).
- 561 32. Reisman, D., Elkind, N. B., Roy, B., Beamon, J. & Rotter, V. c-Myc trans-activates the  
562 p53 promoter through a required downstream CACGTG motif. *Cell Growth Differ* **4**, 57–  
563 65 (1993).
- 564 33. Jao, C. Y. & Salic, A. Exploring RNA transcription and turnover in vivo by using click  
565 chemistry. *Proceedings of the National Academy of Sciences* **105**, 15779–15784 (2008).
- 566 34. Rai, A. K., Chen, J.-X., Selbach, M. & Pelkmans, L. Kinase-controlled phase transition of  
567 membraneless organelles in mitosis. *Nature* 1–25 (2018). doi:10.1038/s41586-018-0279-8
- 568 35. Vagnarelli, P. Mitotic chromosome condensation in vertebrates. *Exp Cell Res* **318**, 1435–  
569 1441 (2012).
- 570 36. Levens, D. Disentangling the MYC web. *Proc Natl Acad Sci USA* **99**, 5757–5759 (2002).
- 571 37. Pellanda, P. *et al.* Integrated requirement of non-specific and sequence-specific DNA  
572 binding in Myc-driven transcription. *EMBO J* **40**, e105464 (2021).
- 573 38. Zeller, K. I., Jegga, A. G., Aronow, B. J., O'Donnell, K. A. & Dang, C. V. An integrated  
574 database of genes responsive to the Myc oncogenic transcription factor: identification of  
575 direct genomic targets. *Genome Biol.* **4**, R69–10 (2003).
- 576 39. Tulpule, A. *et al.* Kinase-mediated RAS signaling via membraneless cytoplasmic protein  
577 granules. *Cell* **184**, 2649–2664.e18 (2021).
- 578 40. Cai, D., Liu, Z. & Lippincott-Schwartz, J. Biomolecular Condensates and Their Links to  
579 Cancer Progression. *Trends Biochem Sci* 1–15 (2021). doi:10.1016/j.tibs.2021.01.002

- 580 41. Boija, A. Biomolecular condensates and cancer. *Cancer Cell* 1–19 (2021).  
581 doi:10.1016/j.ccell.2020.12.003
- 582 42. Tsang, B., Pritišanac, I., Scherer, S. W., Moses, A. M. & Forman-Kay, J. D. Phase  
583 Separation as a Missing Mechanism for Interpretation of Disease Mutations. *Cell* **183**,  
584 1742–1756 (2020).
- 585 43. Jiang, S., Fagman, J. B., Chen, C., Alberti, S. & Liu, B. Protein phase separation and its  
586 role in tumorigenesis. *eLife* **9**, 647–27 (2020).
- 587 44. Sabari, B. R. Biomolecular Condensates and Gene Activation in Development and  
588 Disease. *Dev Cell* **55**, 84–96 (2020).
- 589 45. Wang, W. *et al.* Protein phase separation: A novel therapy for cancer? *Br J Pharmacol*  
590 **177**, 5008–5030 (2020).
- 591 46. Zhu, G. *et al.* Phase Separation of Disease-Associated SHP2 Mutants Underlies MAPK  
592 Hyperactivation. *Cell* 1–32 (2020). doi:10.1016/j.ccell.2020.09.002
- 593 47. Brangwynne, C. P. *et al.* Germline P granules are liquid droplets that localize by  
594 controlled dissolution/condensation. *Science* **324**, 1729–1732 (2009).
- 595 48. Raccaud, M. & Suter, D. M. Transcription factor retention on mitotic chromosomes:  
596 regulatory mechanisms and impact on cell fate decisions. *FEBS Lett* **592**, 878–887 (2017).
- 597 49. Spencer, C. A., Kruhlak, M. J., Jenkins, H. L., Sun, X. & Bazett-Jones, D. P. Mitotic  
598 Transcription Repression in Vivo in the Absence of Nucleosomal Chromatin  
599 Condensation. *J Cell Biol* **150**, 13–26 (2000).
- 600 50. Gottesfeld, J. M. & Forbes, D. J. Mitotic repression of the transcriptional machinery.  
601 *Trends Biochem Sci* **22**, 197–202 (1997).  
602

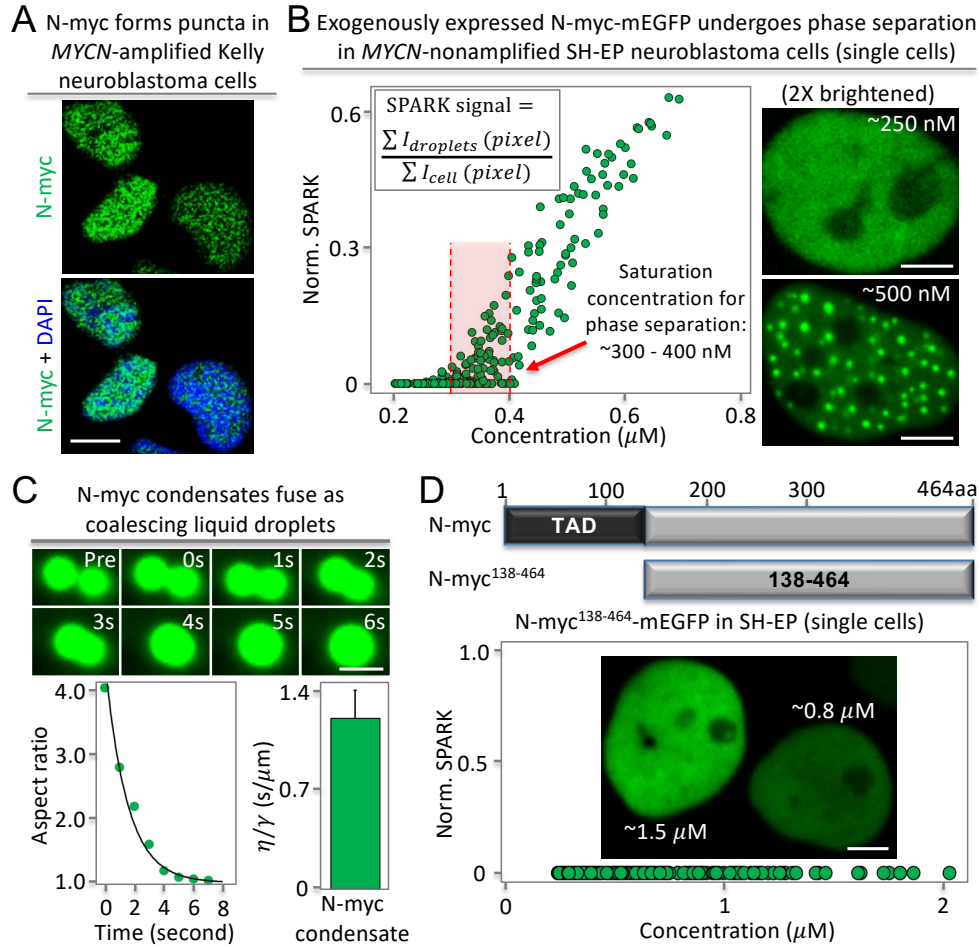

**Fig. 1. N-myc undergoes liquid-liquid phase separation and requires the intrinsically disordered transactivation domain.**

(A) Immunofluorescence images of N-myc in *MYCN*-amplified neuroblastoma Kelly cells. (B) Expression of mEGFP fused N-myc in the neuroblastoma SH-EP cells that have no or little endogenous N-myc protein expression. Left: quantitative analysis of N-myc puncta formation against its protein level in single cells. Each green circle corresponds to individual cells (~300 cells). The concentration of the fusion protein was estimated based on purified mEGFP (detailed in Methods). The red dashed line depicts saturation concentration for phase separation. Right: representative fluorescence images. (C) Fusion events between N-myc condensates. Top: fluorescence images. Bottom-left: quantitative analysis of the fusion events shown in the top. Bottom-right: inverse capillary velocity. Error bar represents standard deviation ( $n = 12$ ). (D) Quantitative analysis of the truncated N-myc lacking N-terminal TAD that is an IDR. Each green circle corresponds to individual cells (~200 cells). Scale bars: 10  $\mu\text{m}$  (A), 5  $\mu\text{m}$  (B, D), 1  $\mu\text{m}$  (C).

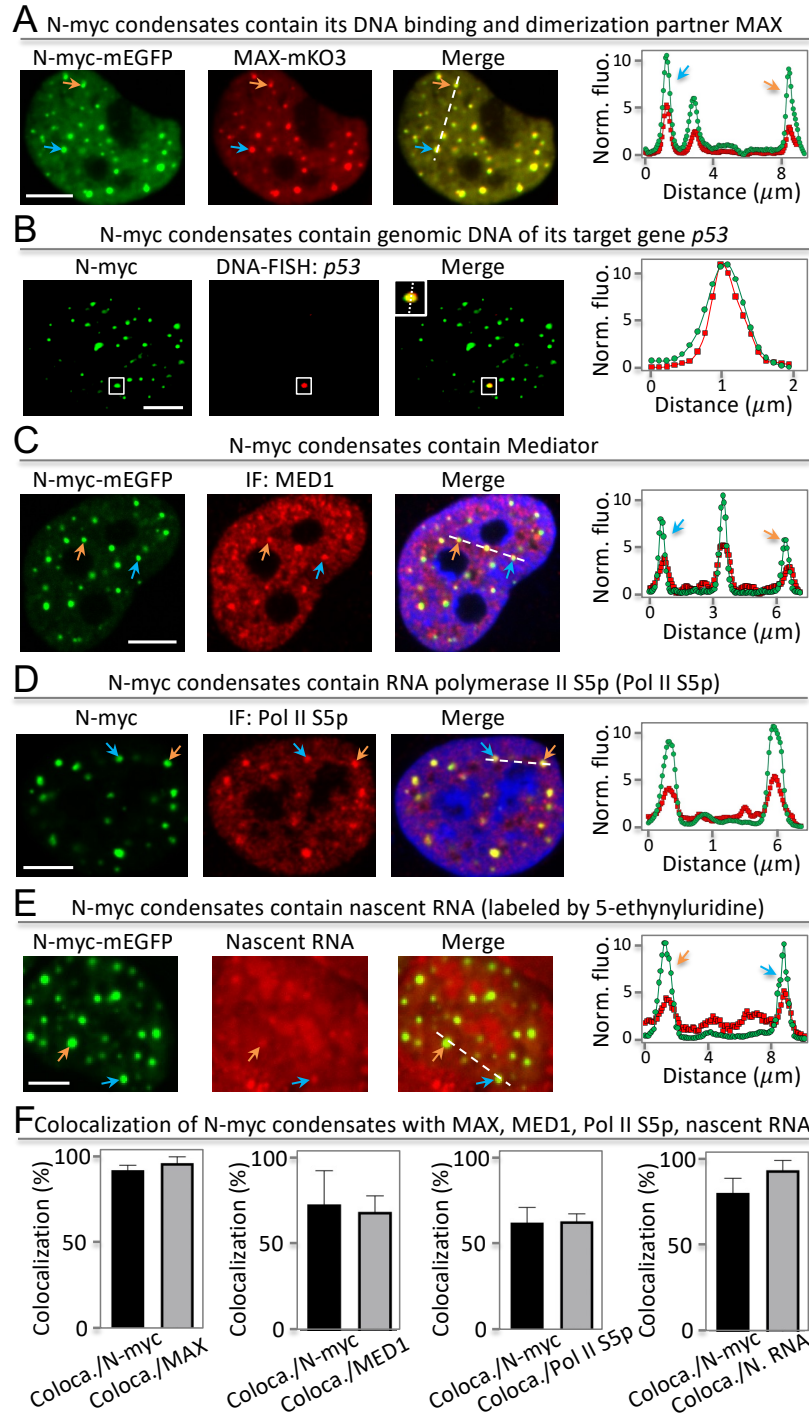

**Fig. 2. N-myc condensates contain DNA-binding and dimerization partner, genomic DNA, transcriptional machinery and nascent RNA.** (A) Fluorescent images of N-myc-mEGFP and MAX-mKO3 in SH-EP cells. The arrows point to representative condensates. The fluorescence intensity plot is shown on the right against position shown by the dashed line. (B) Fluorescence images of N-myc condensates with single molecule DNA FISH against *p53*. (C) Fluorescence images of N-myc condensates with immunofluorescence (IF)-imaged MED1. (D) Fluorescence images of N-myc condensates with immunofluorescence (IF)-imaged Pol II S5p. (E) Fluorescence images of N-myc condensates with nascent RNA labeled

**Fig. 2. Legend (continued)** by 5-ethynyluridine. (F) Percentage of N-myc condensates that colocalize with other condensates. The percentage is determined by the ratio of  $\text{coloca./N-myc} = \text{number of colocalized condensates between N-myc and MAX} / \text{number of N-myc condensates}$ . The same goes for other proteins. Data are mean  $\pm$  SD (n = 13 cells). Scale bars, 5  $\mu\text{m}$  (A – E).



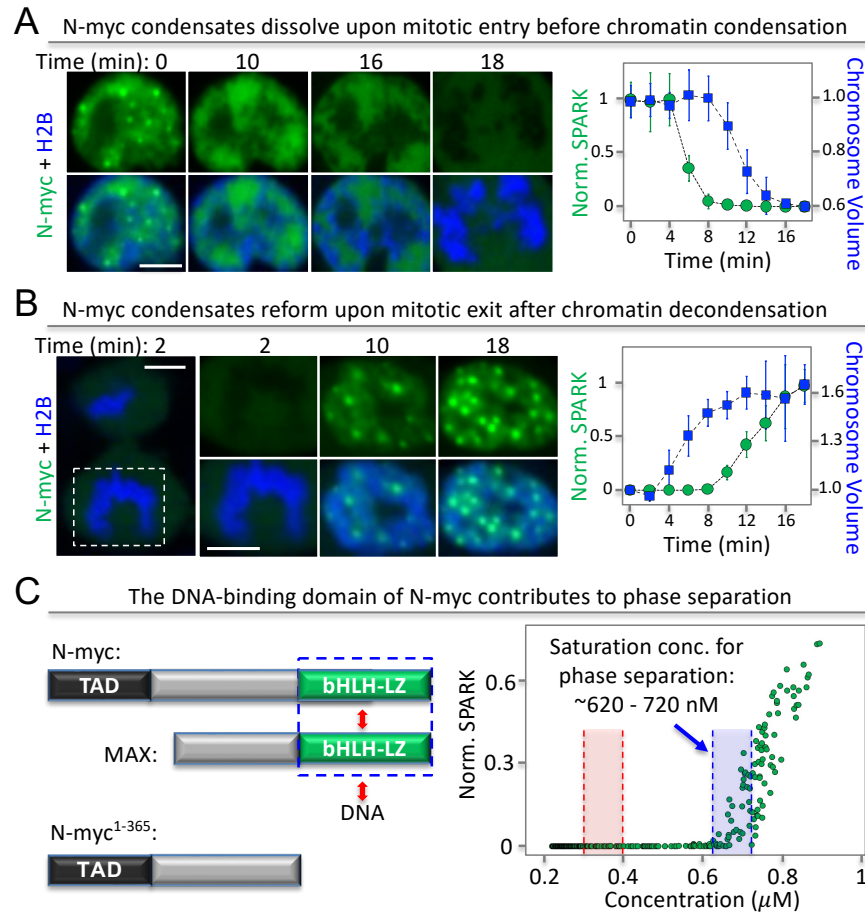

**Fig. 3. Dynamic regulation of N-myc condensates during cell mitosis.**

(A) Time-lapse images of SH-EP cells expressing N-myc-mEGFP upon mitotic entry. The cells co-expressed mIFP-tagged histone 2B (H2B, in blue). Chromosome volume was calculated based on mIFP-H2B fluorescence. Right panel: quantitative analysis of correlation between N-myc condensate dissolution and chromosome condensation. Error bar represents standard deviation (9 cells). (B) Time-lapse images of SH-EP cells expressing N-myc-mEGFP upon mitotic exit. Right panel: quantitative analysis of correlation between N-myc condensate reformation and chromosome de-condensation. Error bar represents standard deviation (7 cells). (C) Phase diagram of the truncated N-myc lacking the DNA-binding domain. The blue box depicts saturation concentration for N-myc<sup>1-365</sup> phase separation. The red box depicts saturation concentration for full length N-myc phase separation (see Fig. 1B).

**A** Lenalidomide-activatable chemogenetic tool SparkDrop drives phase separation of N-myc<sup>138-464</sup> (N-myc<sup>138-464</sup>/SparkDrop: N-myc<sup>138-464</sup>-mEGFP-CEL & ZIF-NLS-EGFP\*-HOTag6)

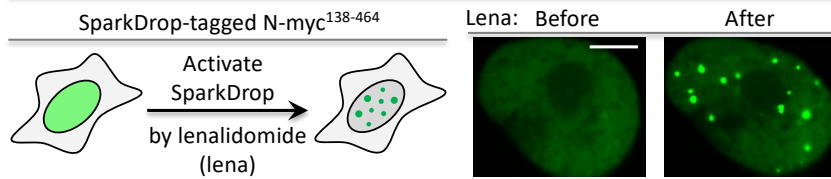

**B** The SparkDrop-driven N-myc<sup>138-464</sup> condensates contain MAX

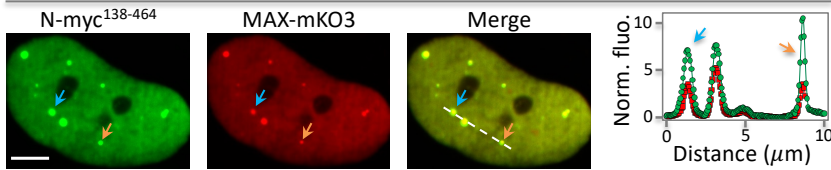

**C** The SparkDrop-driven N-myc<sup>138-464</sup> condensates mostly do not contain Mediator

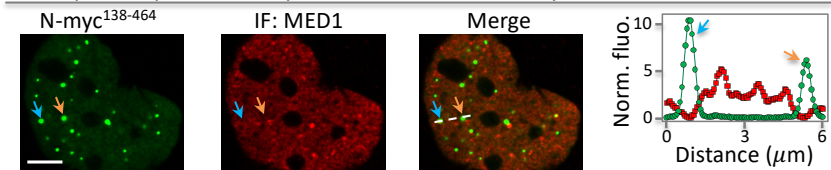

**D** Condensate colocalization of N-myc<sup>138-464</sup>/SparkDrop with MAX, MED1, Pol II S5p

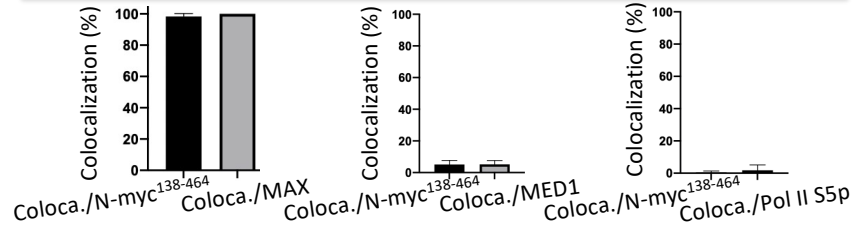

**E** SparkDrop-tagged N-myc<sup>1-365</sup>

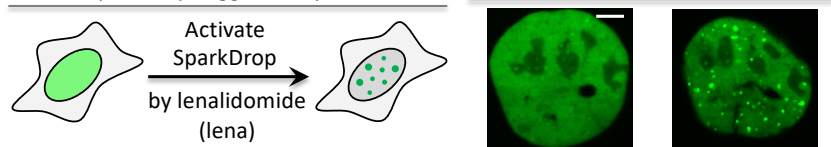

**F** The SparkDrop-driven N-myc<sup>1-365</sup> condensates mostly do not contain Mediator

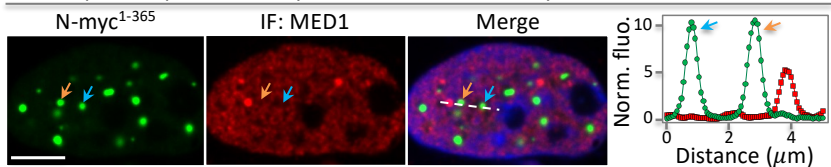

**G** Condensate colocalization of N-myc<sup>1-365</sup>/SparkDrop with MAX, MED1, Pol II S5p

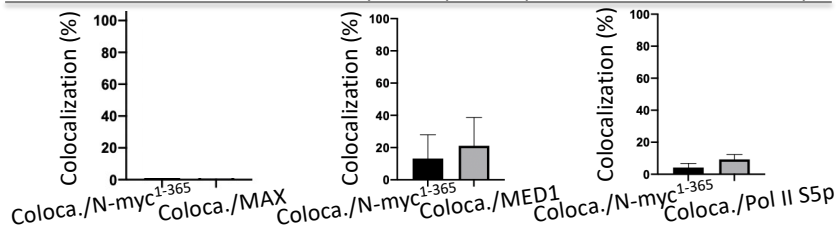

**Fig. 4. Both TAD and DNA-binding domain are required for transcriptional activity of N-myc condensates.** (A) Lenalidomide-activatable SparkDrop drives phase separation of a

**Fig. 4. Legend (continued)** truncated N-myc lacking TAD. (B) Fluorescence images of N-myc<sup>138-464</sup>/SparkDrop with MAX-mKO3. (C) Fluorescence images of SparkDrop-driven N-myc<sup>138-464</sup> condensates and MED1. (D) Percentage of N-myc<sup>138-464</sup>/SparkDrop condensates that colocalize with other condensates. The percentage is determined by the ratio of  $\text{coloca./N-myc}^{138-464} = \text{number of colocalized condensates between N-myc}^{138-464}/\text{SparkDrop and MAX}$  divided by number of N-myc<sup>138-464</sup>/SparkDrop condensates. The same goes for other proteins. Data are mean  $\pm$  SD (n = 15 cells). (E) Lenalidomide-activable SparkDrop drives phase separation of a truncated N-myc lacking DNA-binding domain. (F) Fluorescence images of SparkDrop-driven N-myc<sup>1-365</sup> condensates and MED1. (G) Percentage of N-myc<sup>1-365</sup>/SparkDrop condensates that colocalize with other condensates. The percentage is determined by the ratio of  $\text{coloca./N-myc}^{1-365} = \text{number of colocalized condensates between N-myc}^{1-365}/\text{SparkDrop and MAX}$  divided by number of N-myc<sup>1-365</sup>/SparkDrop condensates. The same goes for other proteins. Data are mean  $\pm$  SD (n = 15 cells). Scale bars: 5  $\mu\text{m}$  (A – C, E, F).

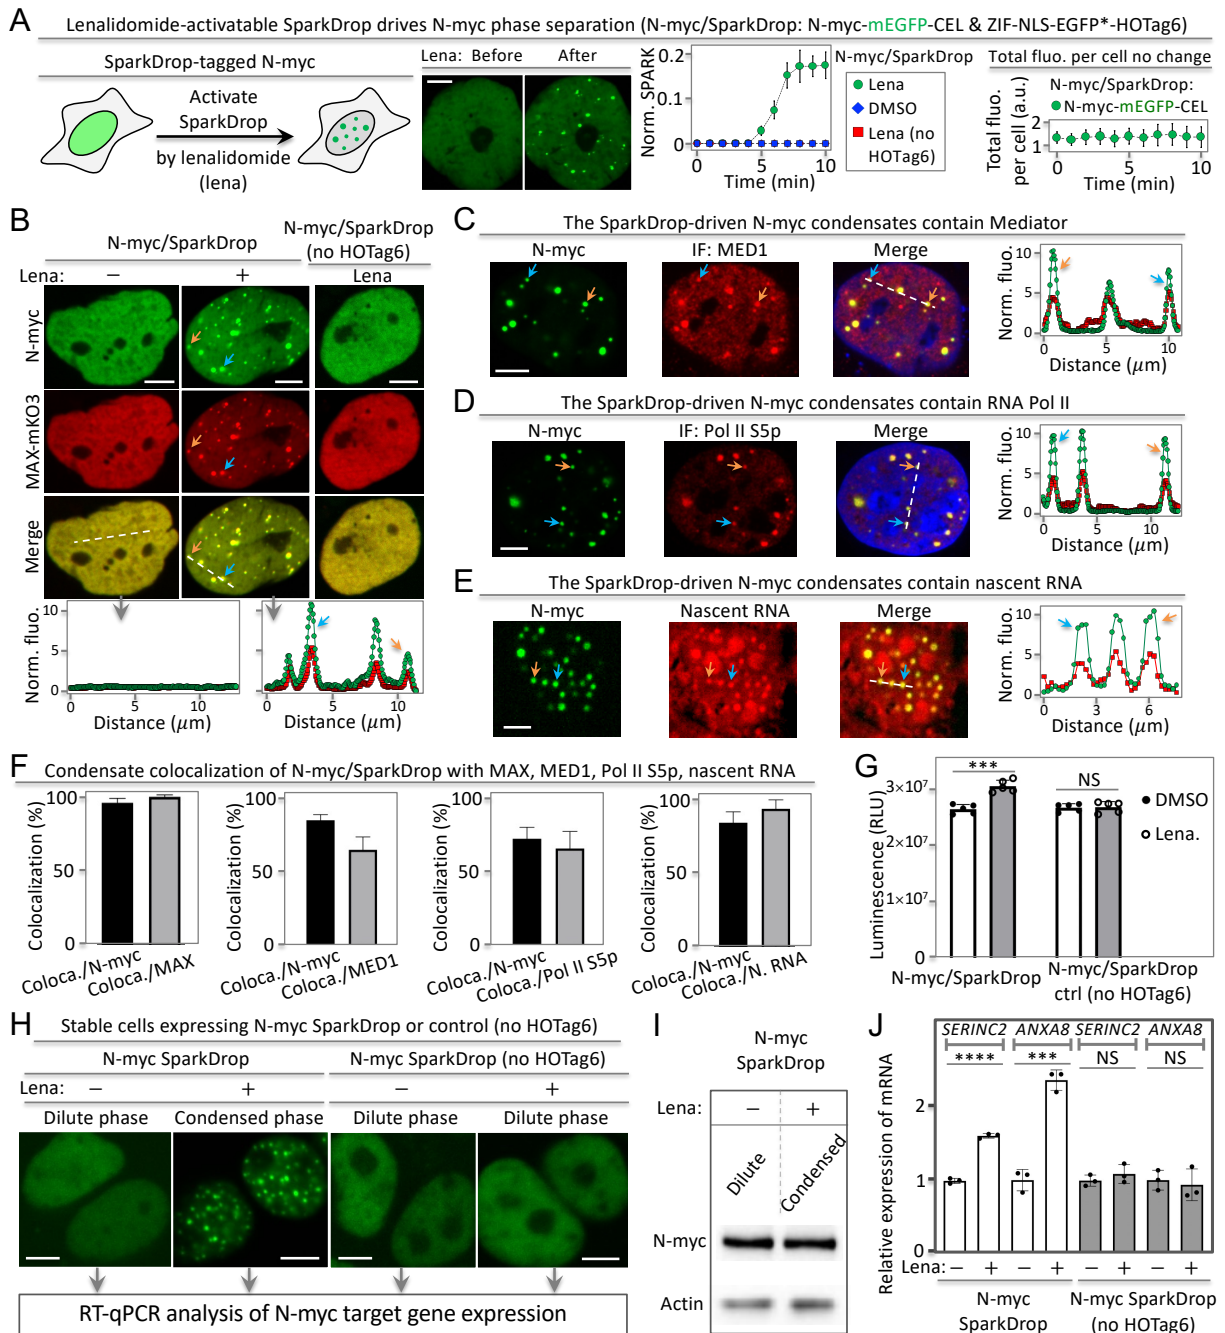

**Fig. 5. The chemogenetic tool SparkDrop reveals role of phase separation of N-myc on transcription.** (A) SparkDrop drives N-myc phase separation without change of protein level. (B) SparkDrop-driven N-myc condensates contain DNA-binding and dimerization partner MAX. (C – E) Fluorescence images showing SparkDrop-driven N-myc condensates contain transcriptional machinery including MED1 (C), RNA Pol II S5p (D), and nascent RNA (E). (F) Percentage of N-myc/SparkDrop condensates that colocalize with other condensates. The percentage is determined by the ratio of  $\text{coloca./N-myc} = \text{number of colocalized condensates between N-myc/SparkDrop and MAX} / \text{number of N-myc/SparkDrop condensates}$ . The same goes for other proteins including nascent RNA (N. RNA). Data are mean  $\pm$  SD ( $n = 13$  cells). (G) Quantitative analysis of SH-EP cell proliferation using CellTiter-Glo with N-myc

**Fig. 5. Legend (continued)** in dilute vs condensed phase. Luminescence was measured after the cells were treated with DMSO or lenalidomide (1 $\mu$ M) for 72 hrs. Data are mean  $\pm$  SD (n = 5). \*\*\* P-value < 0.001. (H) Fluorescent images of stable cells expressing SparkDrop-tagged N-myc or the control. The cells were treated with lenalidomide or DMSO, followed by RT-qPCR analysis. (I) Western blot showing N-myc protein abundance level. (J) RT-qPCR analysis of two N-myc-regulated genes' expression level in the cells with condensed and dilute phase of N-myc. Data are mean  $\pm$  SD (n = 3). \*\*\*\*P-value < 0.0001. \*\*\* P-value < 0.001. NS, not significant. Scale bars: 5  $\mu$ m (A – E, H).



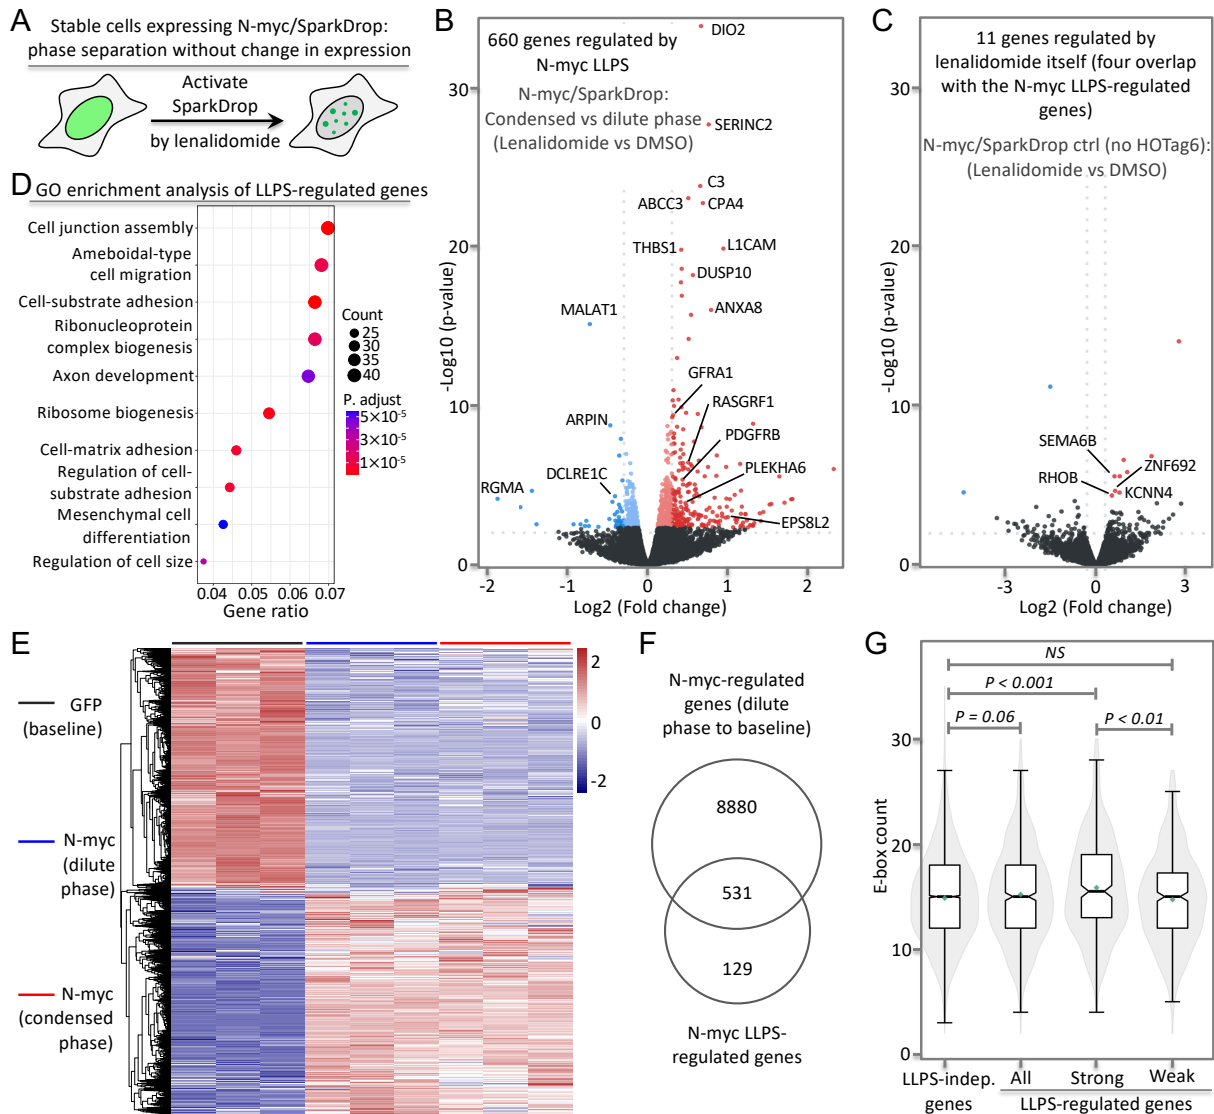

**Fig. 6. Phase separation of N-myc differentially regulates transcriptome.** (A) Schematic of SparkDrop-based N-myc phase separation without change of protein level. (B) Volcano plot showing fold change of mRNA levels ( $\log_2$  fold change) for N-myc in the condensed to dilute phase (i.e. lenalidomide to DMSO) plotted against its p-value ( $-\log_{10}$ ). mRNAs showing significant up- and down-regulation (p-value  $< 0.01$ , FDR  $< 0.1$ ) are marked in red and blue, respectively. Black dots represent mRNAs with no significant changes. The DEGs with  $|\log_2\text{FC}| > 0.3$  or  $< 0.3$  are categorized as strongly and weakly regulated groups, which are marked by solid and shaded colors, respectively. (C) Volcano plot showing fold change of mRNA levels for the N-myc SparkDrop control (no HOTag6) in lenalidomide to DMSO samples. mRNAs showing significant up- and down-regulation (p-value  $< 0.01$ , FDR  $< 0.1$ ) are marked in red and blue, respectively. The four overlapped genes are labeled. See the full list in supporting excel file 4. (D) GO enrichment analysis of the N-myc LLPS-regulated genes. (E) Heat map showing mRNA levels of N-myc core genes that are significantly regulated. The number of the color key represents z-scores. (F) Venn diagram showing the overlap of N-myc-regulated genes (top, dilute phase) and the N-myc phase separation-regulated genes (bottom). (G) E-box enrichment analysis between the N-myc LLPS-

**Fig. 6. Legend (continued)** independent genes and the LLPS-regulated genes including strongly and weakly regulated groups. P values are indicated (Wilcoxon test). NS: not significant (p-value = 0.69).
